# Supplementary material for: Comprehensive studies of non-covalent interactions within four new Cu(ii) supramolecules
Source: Royal Society of Chemistry journal article supplement (doi:10.1039/c2ce26442k), 2012-01-01
Supplement: c2ce26442k.pdf [file c2ce26442k.pdf]

**Figure captions**

**Figure 1S.** Interaction energies of the H-bonded trimer (top) (**I**-fragment1) and the C–H··· $\pi$  bonded trimer (bottom) (**I**-fragment2) of **I**<sub>mon</sub> (Å).

**Figure 2S.** Interaction energy of the H-bonded trimer (**I'**-fragment1) of **I**<sub>mon</sub> (Å).

**Figure 3S.** Interaction energy of the H-bonded and  $\pi$  stacked **I'**-fragment2 of **I'**-fragment1.

**Figure 4S.** Stabilization energy of **I'**<sub>net</sub> compared to **I'**-fragment2.

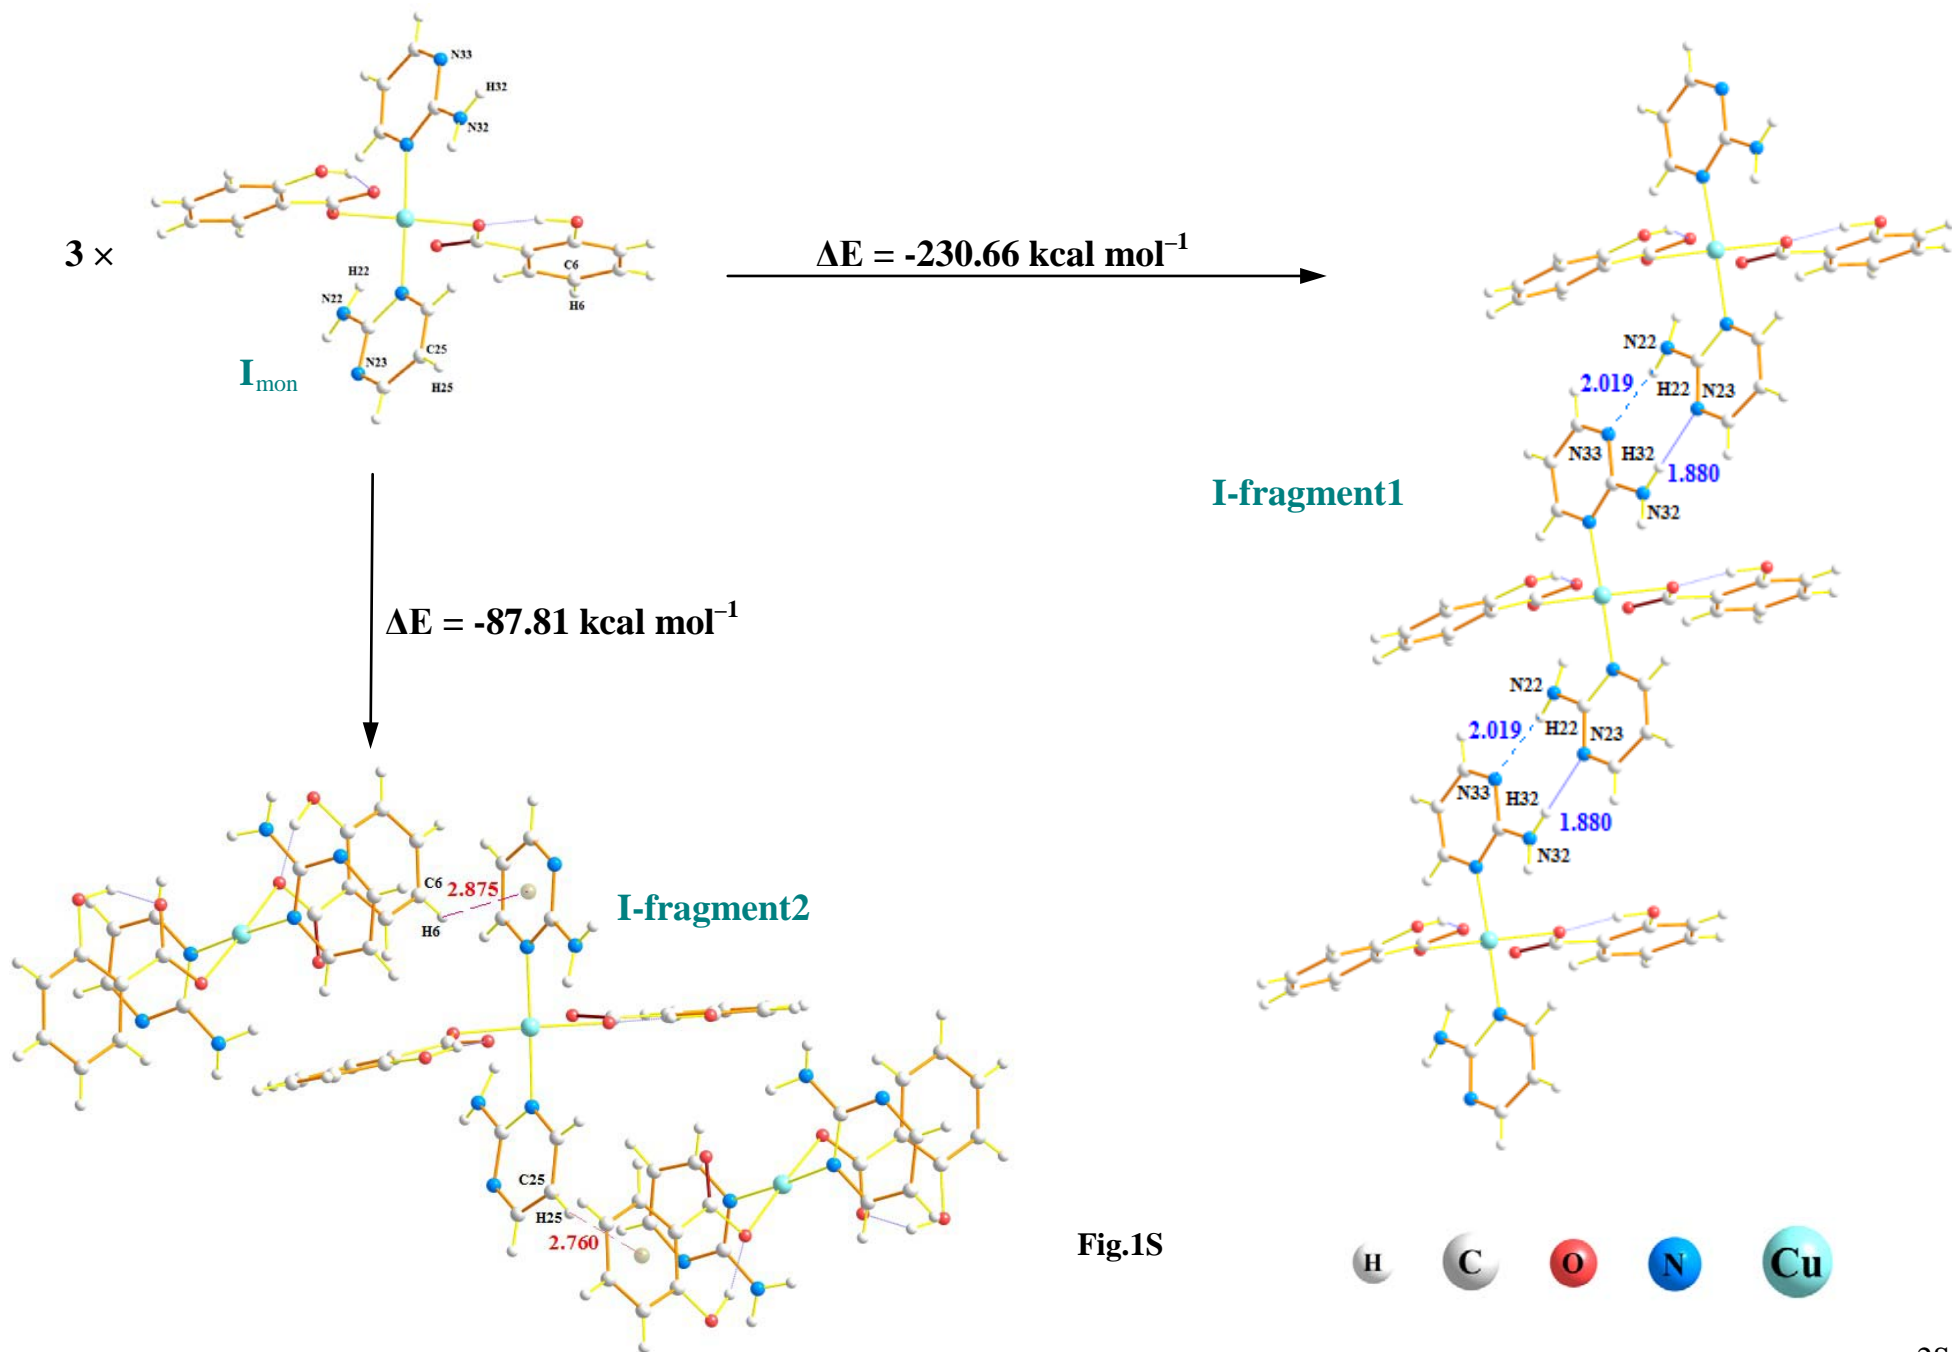

Fig.1S

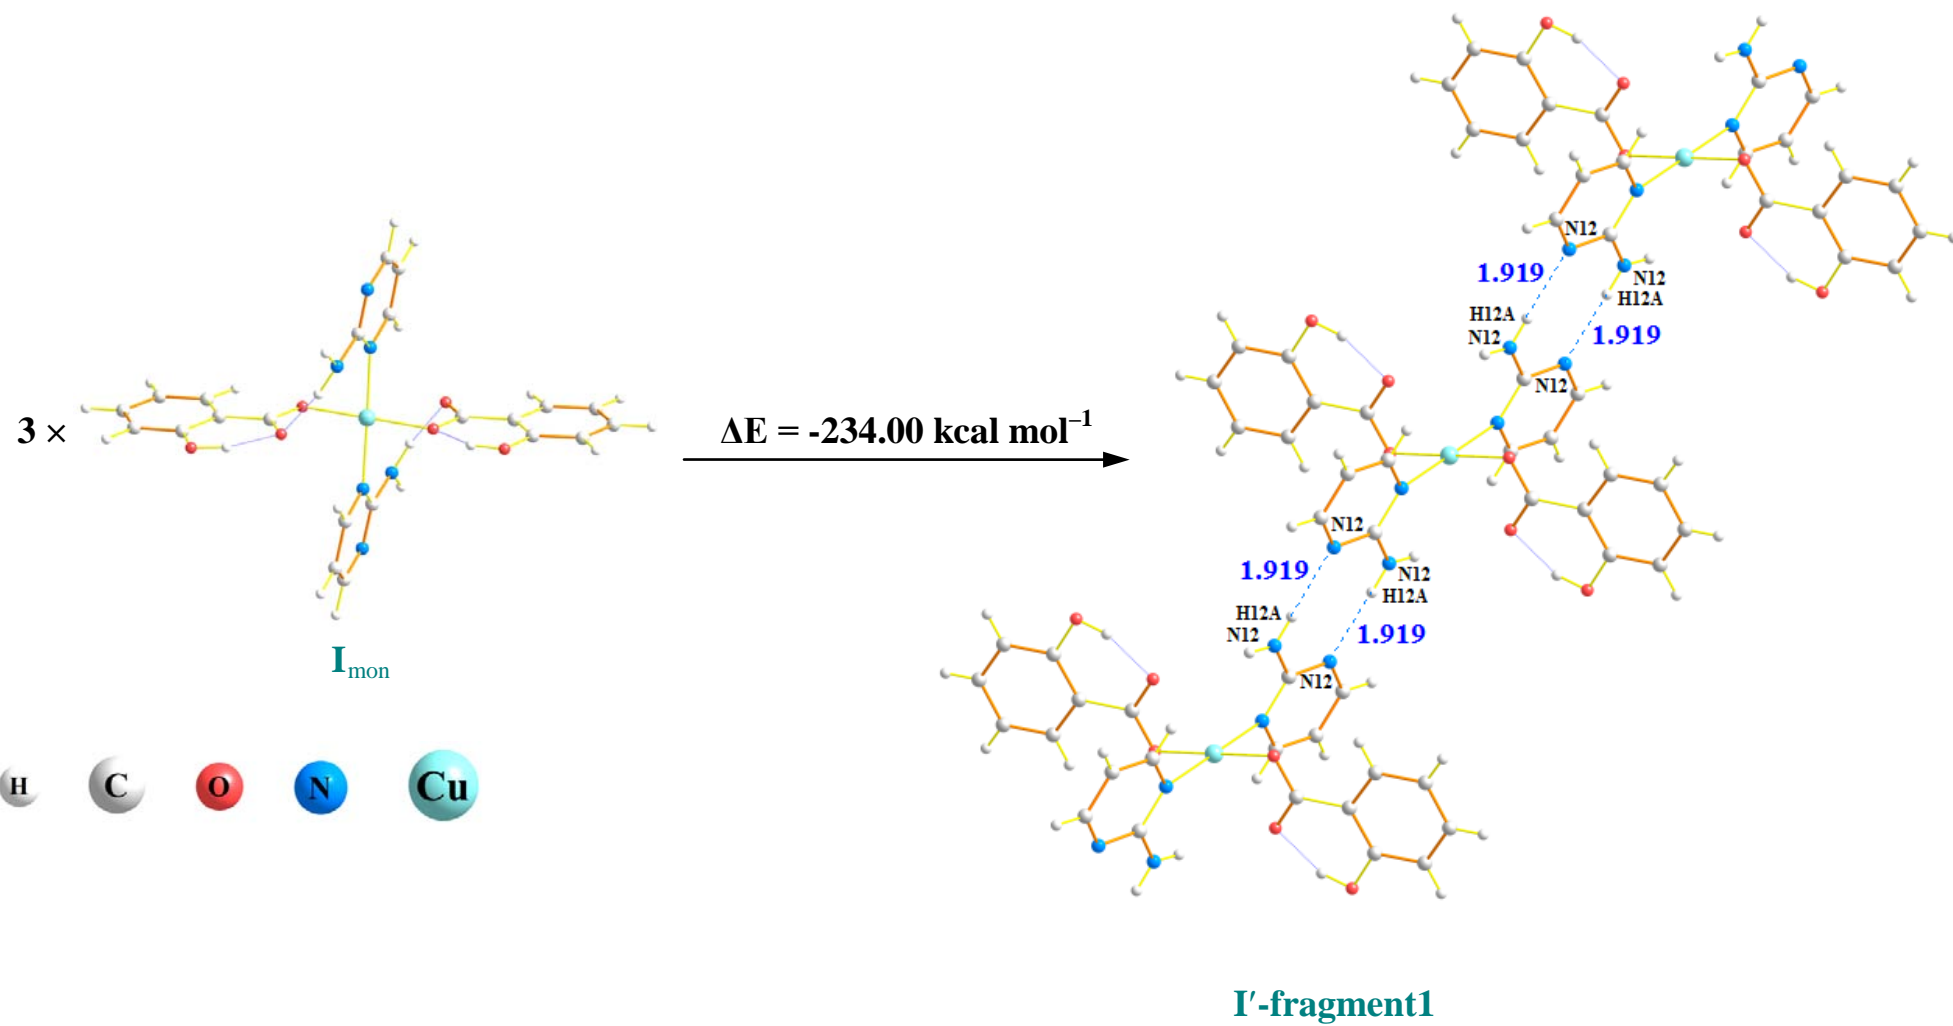

Fig. 2S

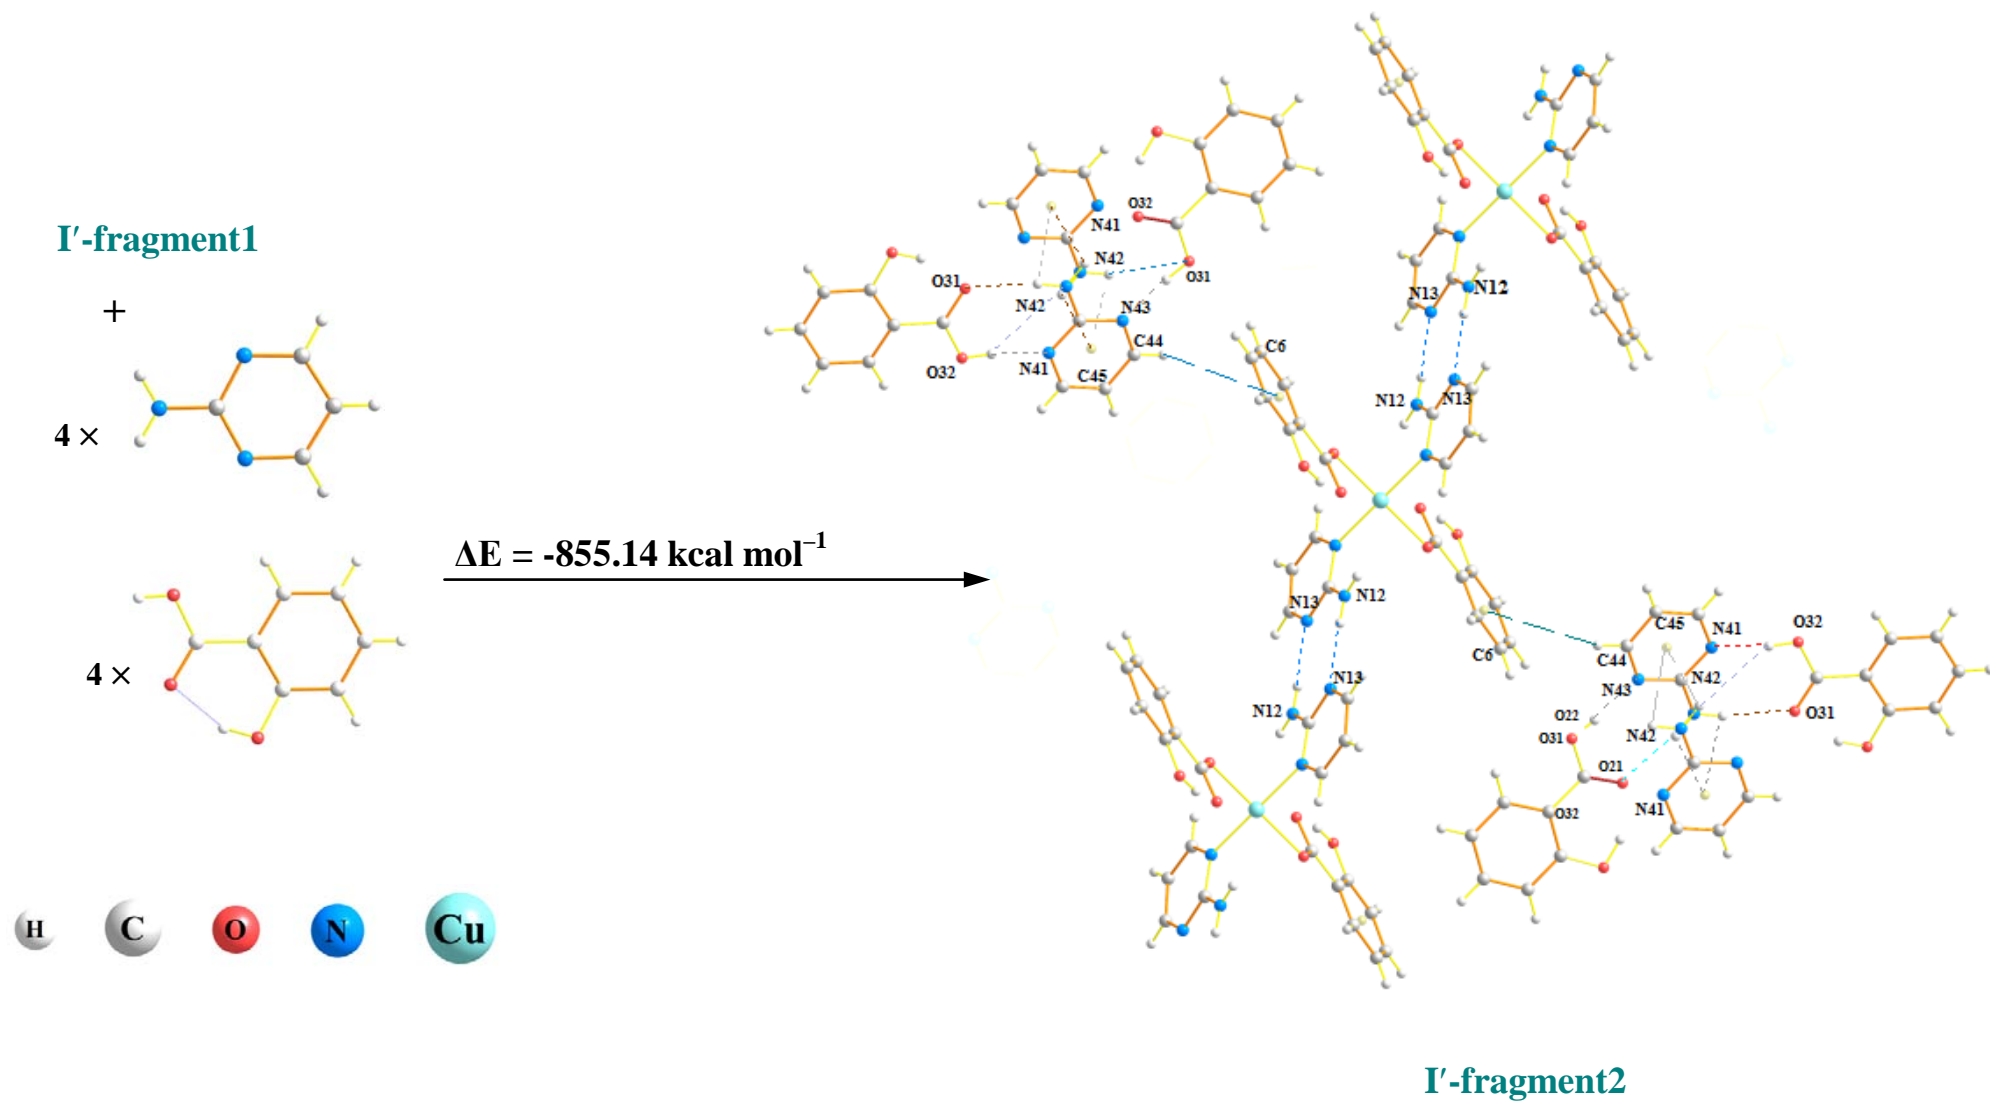

Fig. 3S

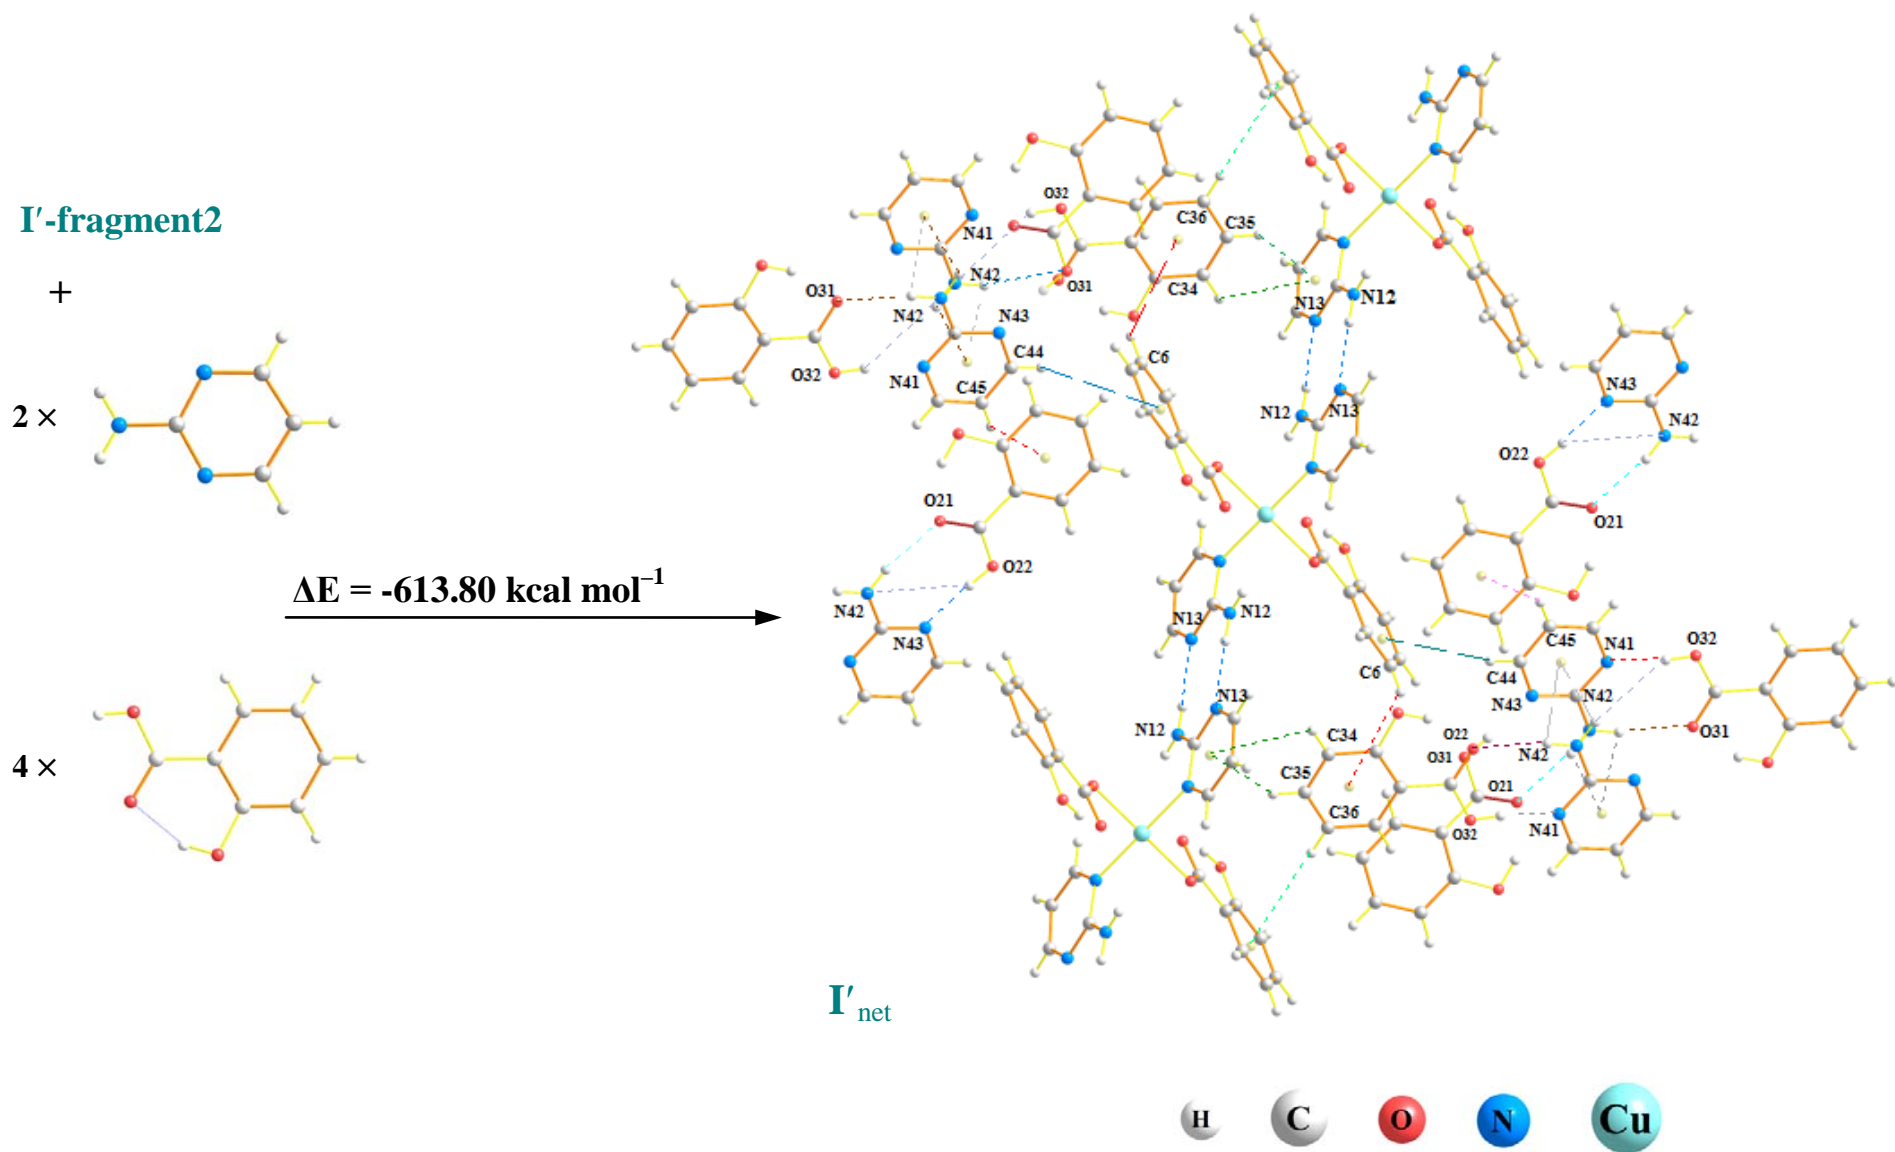

Fig. 4S
